# Supplementary material
Source: Springer Nature journal article supplement (https://www.springermedizin.de/resource/supplementary/12985_2009_678_MOESM8_ESM.pdf/9608252)

dN/dS = 0.515; 100%

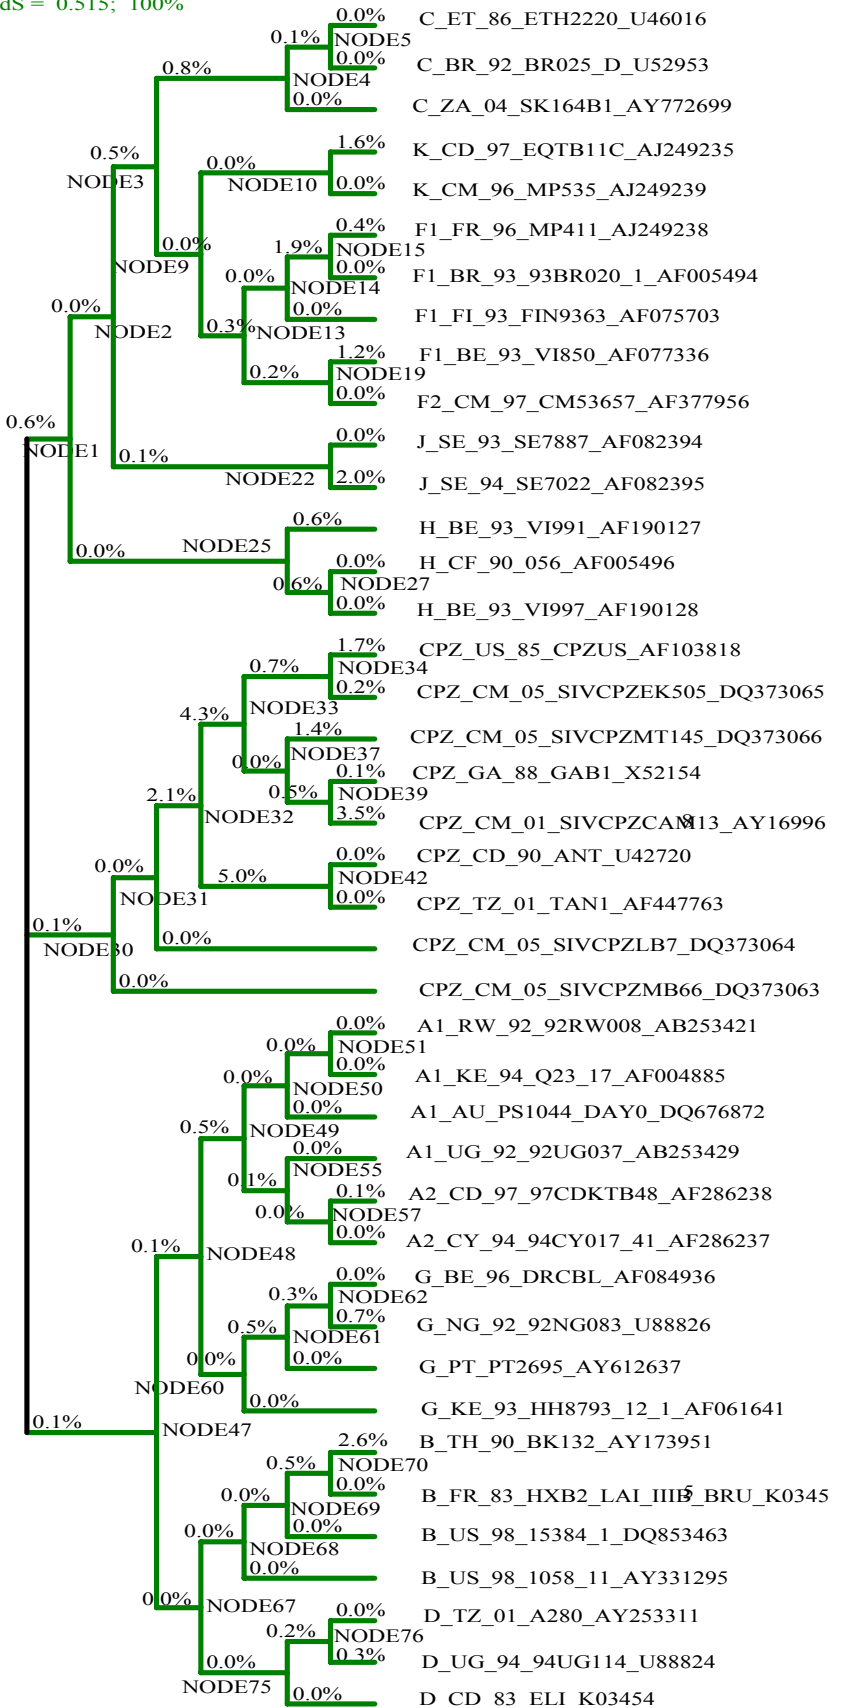

Supplement: MOESM8 [file 9608252]
